# Supplementary material for: Exogenous enzyme performance during fermentation of red sorghum malt wort
Source: Research Square preprint supplement (doi:10.21203/rs.3.rs-8482446/v1), 2026-01-22
Supplement: Supplementary file 1 [file 0af96fb1d4b8f84f1bcddcaa.docx]

**Supplementary table1. Tukey’s HSD grouping of treatments for alcohol content (% v/v).**

| **Treatment** | **Alcohol (% v/v)** | **Tukey letter** |
| --- | --- | --- |
| T4 | 4.5 ± 0.04 | a |
| T1 | 4.2 ± 0.02 | a |
| T3 | 4.1 ± 0.04 | a |
| T2 | 2.6 ± 0.04 | b |
| T7 | 2.1 ± 0.08 | c |
| T5 | 2.0 ± 0.03 | c |
| T6 | 2.0 ± 0.07 | c |

Values are expressed as mean ± standard deviation. Different letters within the same column indicate significant differences among treatments according to Tukey’s HSD test at p < 0.05.

**Supplementary table 2. Tukey’s HSD grouping of treatments for final pH values.**

| **Treatment** | **pHf** | **Tukey letter** |
| --- | --- | --- |
| T1 | 4.00 ± 0.01 | c |
| T7 | 4.06 ± 0.04 | c |
| T4 | 4.24 ± 0.04 | b |
| T3 | 4.27 ± 0.03 | b |
| T2 | 4.34 ± 0.03 | a |
| T5 | 4.36 ± 0.04 | a |
| T6 | 4.36 ± 0.04 | a |

Values are expressed as mean ± standard deviation. Different letters within the same column indicate significant differences among treatments according to Tukey’s HSD test at p < 0.05.

**Supplementary table 3.Tukey’s HSD grouping of treatments for final density (°P).**

| **Treatment** | **Df (°P)** | **Tukey letter** |
| --- | --- | --- |
| T4 | 6.5 ± 0.08 | c |
| T1 | 7.1 ± 0.05 | c |
| T3 | 7.4 ± 0.08 | c |
| T2 | 10.1 ± 0.09 | b |
| T7 | 11.4 ± 0.17 | a |
| T5 | 11.5 ± 0.06 | a |
| T6 | 11.5 ± 0.14 | a |

Values are expressed as mean ± standard deviation. Different letters within the same column indicate significant differences among treatments according to Tukey’s HSD test at p < 0.05.

**Supplementary table 4. Tukey’s HSD grouping of treatments for residual sugars (RSf).**

| **Treatment** | **RSf** | **Tukey letter** |
| --- | --- | --- |
| T5 | 37.8 ± 1.4 | c |
| T4 | 40.2 ± 1.5 | c |
| T1 | 42.6 ± 1.6 | c |
| T3 | 45.0 ± 1.7 | b |
| T2 | 60.0 ± 2.0 | a |
| T7 | 67.3 ± 1.14 | a |
| T6 | 69.0 ± 2.2 | a |

Values are expressed as mean ± standard deviation. Different letters within the same column indicate significant differences among treatments according to Tukey’s HSD test at p < 0.05.

**Supplementary table 5. Tukey’s HSD grouping of treatments for dissolved oxygen (ppm).**

| **Treatment** | **O₂ (ppm)** | **Tukey letter** |
| --- | --- | --- |
| T1 | 0.10 ± 0.01 | c |
| T3 | 0.10 ± 0.01 | c |
| T4 | 0.10 ± 0.01 | c |
| T5 | 0.10 ± 0.01 | c |
| T6 | 0.12 ± 0.01 | b |
| T7 | 0.20 ± 0.01 | a |
| T2 | 0.40 ± 0.01 | a |

Values are expressed as mean ± standard deviation. Different letters within the same column indicate significant differences among treatments according to Tukey’s HSD test at p < 0.05.

**Supplementary table 6. Tukey’s HSD grouping of treatments for real extract.**

| **Treatment** | **RE** | **Tukey letter** |
| --- | --- | --- |
| T4 | 7.9 ± 0.06 | c |
| T1 | 8.41 ± 0.04 | c |
| T3 | 8.77 ± 0.06 | c |
| T2 | 10.9 ± 0.07 | b |
| T7 | 11.9 ± 0.14 | a |
| T6 | 11.5 ± 0.14 | a |
| T5 | 12.0 ± 0.05 | a |

Values are expressed as mean ± standard deviation. Different letters within the same column indicate significant differences among treatments according to Tukey’s HSD test at p < 0.05.

**Supplementary table 7. Tukey’s HSD grouping of treatments for apparent attenuation (%).**

| **Treatment** | **Att (%)** | **Tukey letter** |
| --- | --- | --- |
| T4 | 54.8 ± 0.52 | a |
| T1 | 51.4 ± 0.34 | a |
| T3 | 49.1 ± 0.55 | a |
| T2 | 29.0 ± 0.61 | b |
| T7 | 21.5 ± 1.15 | c |
| T5 | 20.7 ± 0.44 | c |
| T6 | 20.6 ± 0.99 | c |

Values are expressed as mean ± standard deviation. Different letters within the same column indicate significant differences among treatments according to Tukey’s HSD test at p < 0.05.

**Supplementary table 8. Gompertz Parameters**

| Treatment | Amax (% v/v) | mu_max | lag (h) | RÂ² | RMSE |
| --- | --- | --- | --- | --- | --- |
| T1 | 7.26 | 0.026 | 17.75 | 0.961 | 0.278 |
| T2 | 4.75 | 0.01 | -23.67 | 0.851 | 0.254 |
| T3 | 3.97 | 0.026 | -30.16 | 0.844 | 0.445 |
| T4 | 5.27 | 0.026 | -4.18 | 0.97 | 0.246 |
| T5 | 2.93 | 0.011 | -1.24 | 0.975 | 0.097 |
| T6 | 2.77 | 0.011 | -0.15 | 0.975 | 0.094 |
| T7 | 1.99 | 0.016 | -10.51 | 0.927 | 0.17 |


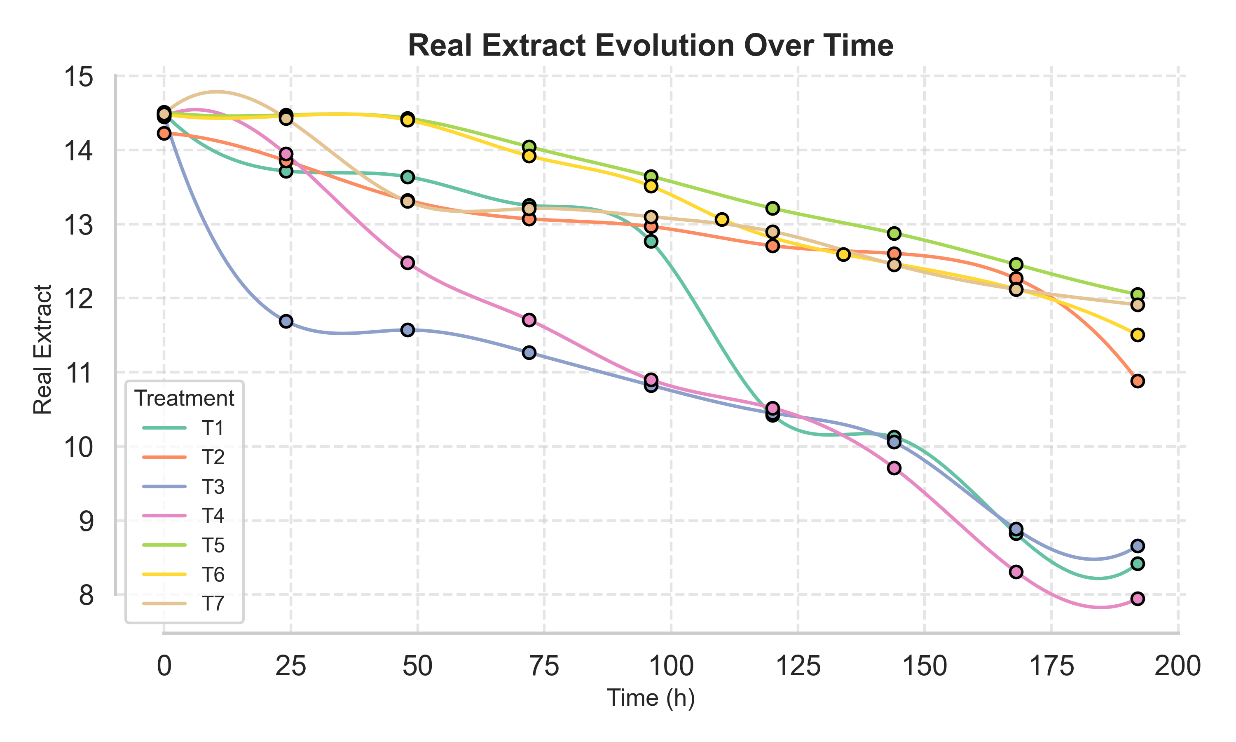


**Supplementary figure 1. Evolution of Real Extract over Time**

**T1:** corn amylases, **T2**: sweet potato amylases, **T3:** Munkoyo root amylases, **T4:** corn and sweet potato amylases, **T5**: corn and Munkoyo root amylases, **T6:** amylases from Munkoyo roots and sweet potatoes, **T7**: amylases from corn, Munkoyo roots, and sweet potatoes.


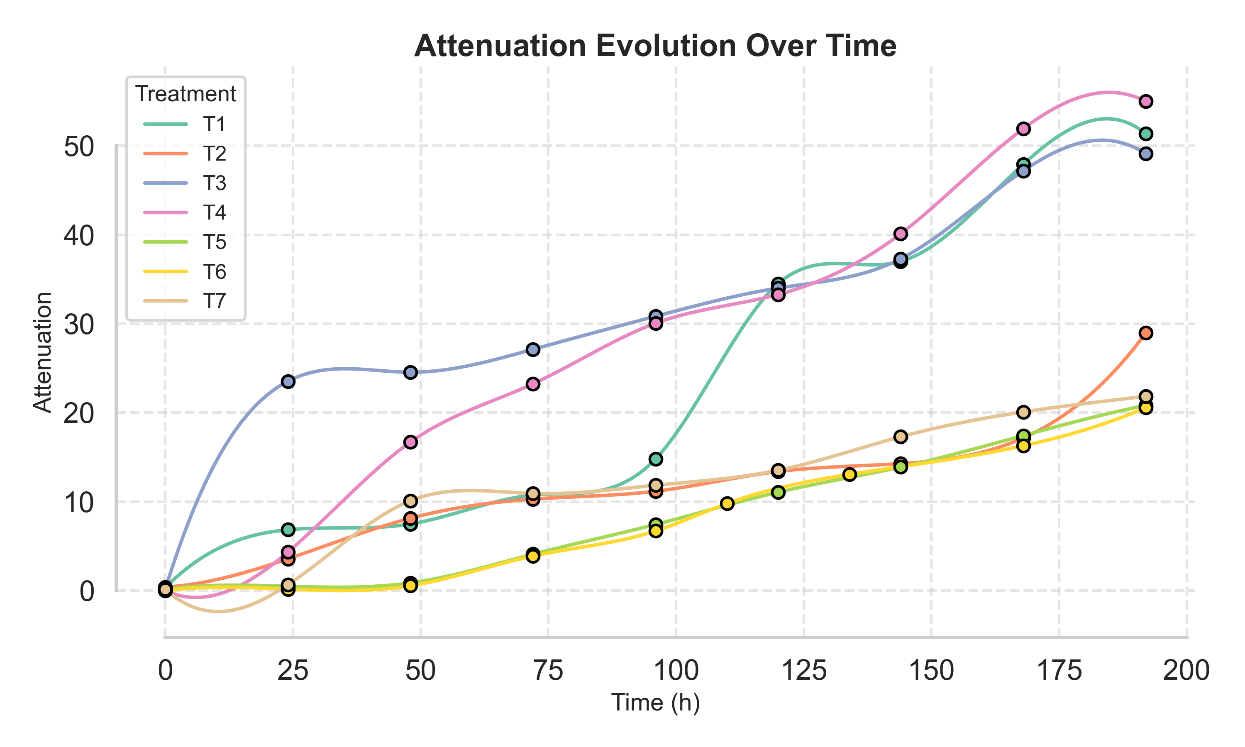


**Supplementary figure 2. Evolution of Attenuation over Time**

**T1:** corn amylases, **T2**: sweet potato amylases, **T3:** Munkoyo root amylases, **T4:** corn and sweet potato amylases, **T5**: corn and Munkoyo root amylases, **T6:** amylases from Munkoyo roots and sweet potatoes, **T7**: amylases from corn, Munkoyo roots, and sweet potatoes.


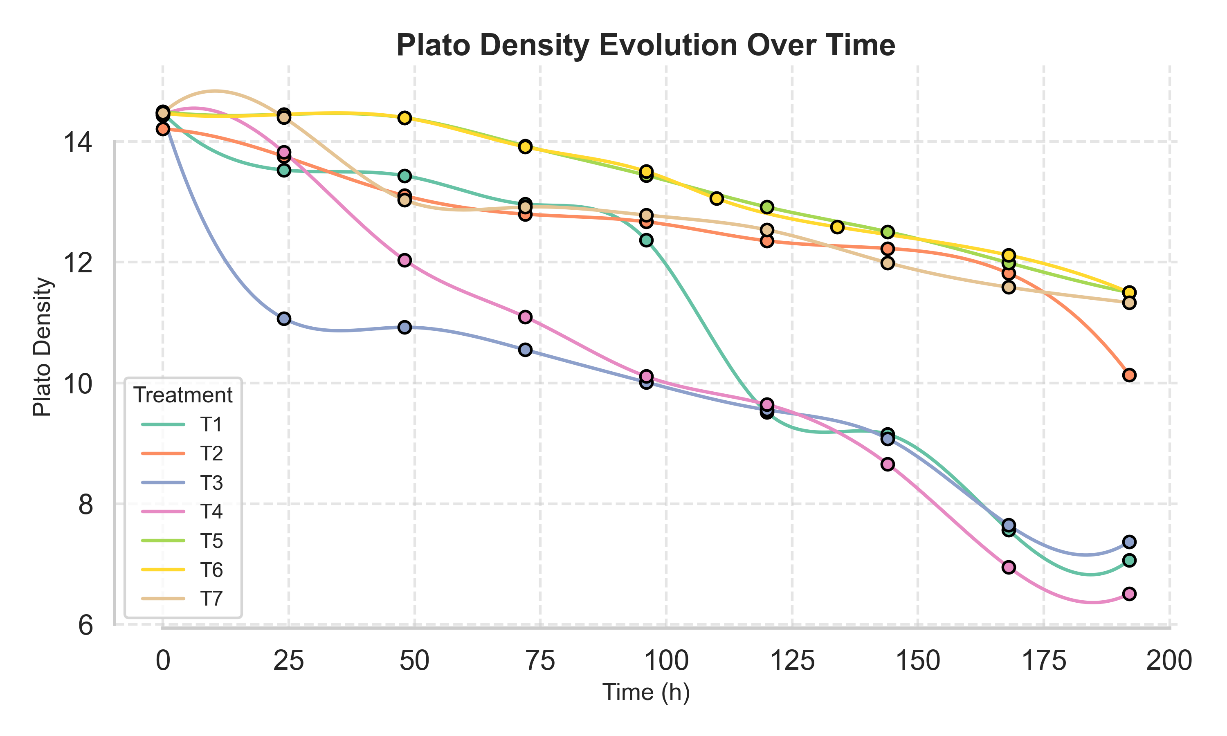


**Supplementary figure 3. Evolution of Density (D °P) over Time**

**T1:** corn amylases, **T2**: sweet potato amylases, **T3:** Munkoyo root amylases, **T4:** corn and sweet potato amylases, **T5**: corn and Munkoyo root amylases, **T6:** amylases from Munkoyo roots and sweet potatoes, **T7**: amylases from corn, Munkoyo roots, and sweet potatoes.


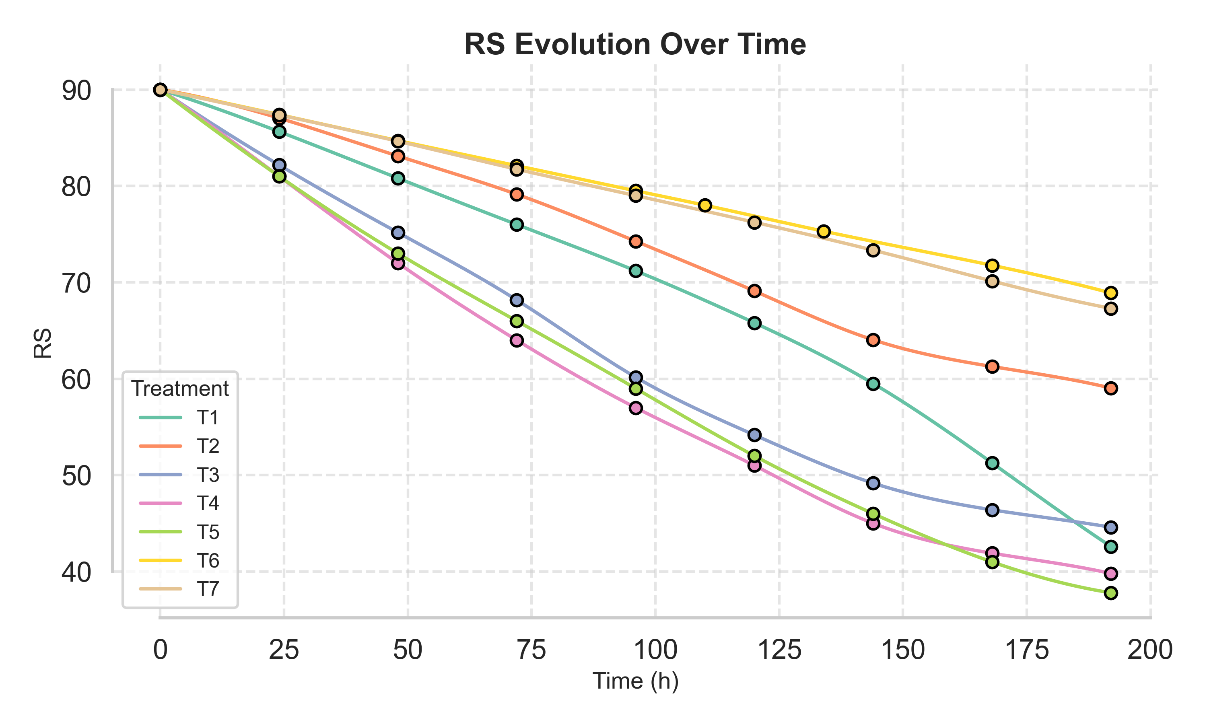


**Supplementary figure 4. Evolution of Released sugars over Time**

**T1:** corn amylases, **T2**: sweet potato amylases, **T3:** Munkoyo root amylases, **T4:** corn and sweet potato amylases, **T5**: corn and Munkoyo root amylases, **T6:** amylases from Munkoyo roots and sweet potatoes, **T7**: amylases from corn, Munkoyo roots, and sweet potatoes.


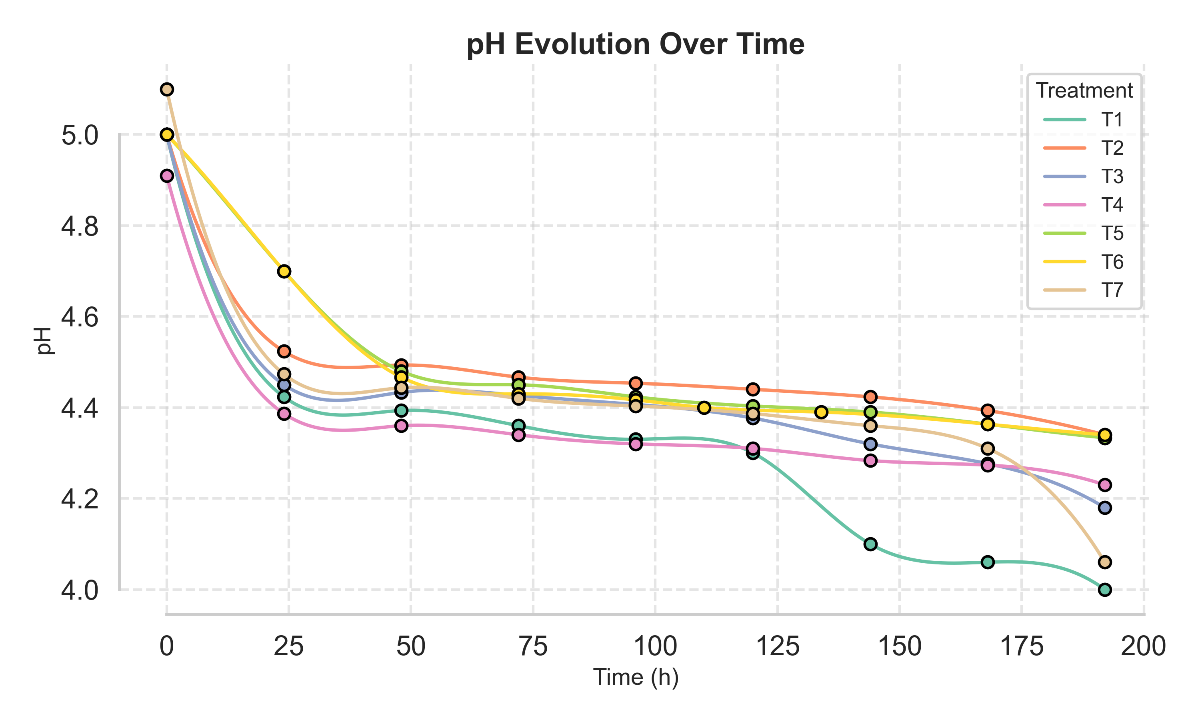


**Supplementary figure 5. Evolution of pH over Time**

**T1:** corn amylases, **T2**: sweet potato amylases, **T3:** Munkoyo root amylases, **T4:** corn and sweet potato amylases, **T5**: corn and Munkoyo root amylases, **T6:** amylases from Munkoyo roots and sweet potatoes, **T7**: amylases from corn, Munkoyo roots, and sweet potatoes.


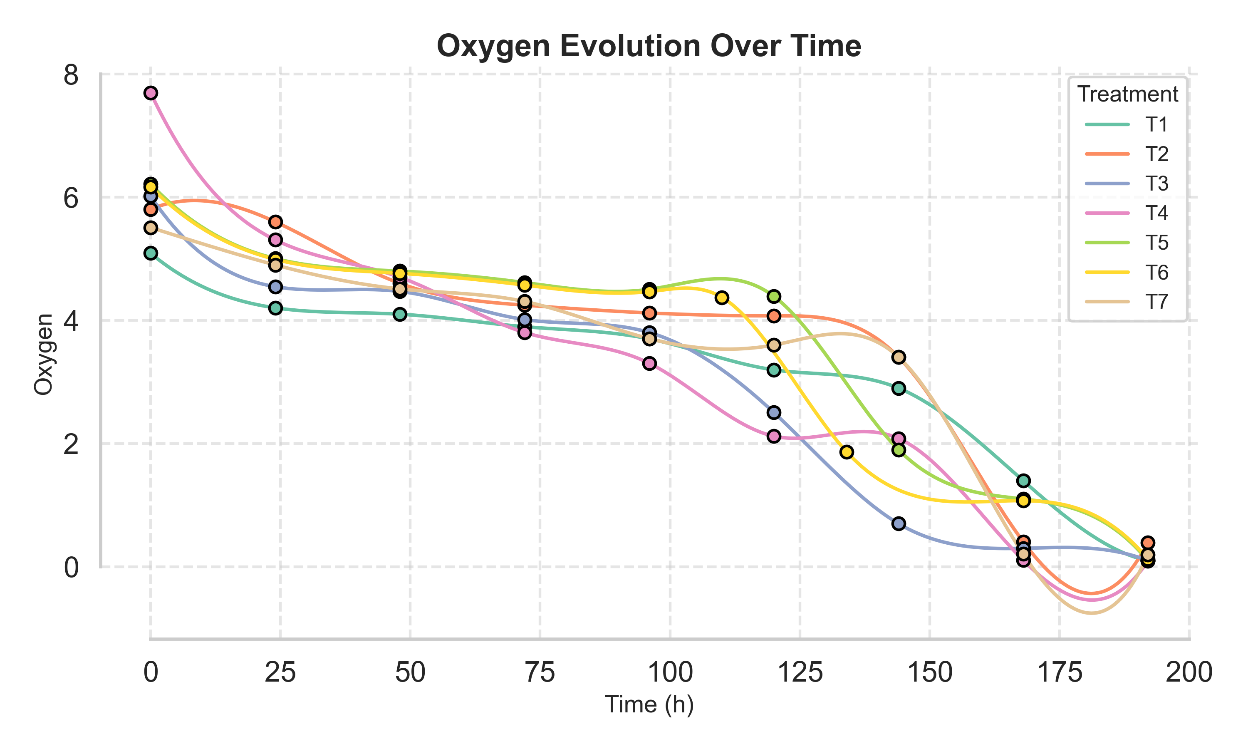


**Supplementary figure 6. Evolution of Dissolved oxygen over Time**

**T1:** corn amylases, **T2**: sweet potato amylases, **T3:** Munkoyo root amylases, **T4:** corn and sweet potato amylases, **T5**: corn and Munkoyo root amylases, **T6:** amylases from Munkoyo roots and sweet potatoes, **T7**: amylases from corn, Munkoyo roots, and sweet potatoes.
